# Supplementary material for: Single-cell RNA sequencing reveals ex vivo signatures of SARS-CoV-2-reactive T cells through ‘reverse phenotyping’
Source: Springer Nature journal article supplement (doi:10.1038/s41467-021-24730-4), 2021-07-26
Supplement: MOESM2 [file 41467_2021_24730_MOESM2_ESM.pdf › 41467_2021_24730_MOESM2_ESM.pdf]

## **Description of Additional Supplementary Files**

**Supplementary Data 1:** Clinical information on patients from Munich cohort

**Supplementary Data 2:** Differential gene expression results of CD8 T cells in IFNG cluster compared with other CD8 T cells in stimulated condition

**Supplementary Data 3:** Differential gene expression results of CD4 T cells in IFNG cluster compared with other CD4 T cells in stimulated condition

**Supplementary Data 4:** Differential gene expression results of SARS-CoV-2-reactive CD4 T cells unstimulated versus stimulated condition

**Supplementary Data 5:** Differential gene expression results of SARS-CoV-2-reactive CD8 T cells unstimulated versus stimulated condition

**Supplementary Data 6:** Differential gene expression results of unstimulated CD4 T cells between SARS-CoV-2-reactive and non-reactive cells

**Supplementary Data 7:** Differential gene expression results of unstimulated CD8 T cells between SARS-CoV-2-reactive and non-reactive cells

**Supplementary Data 8:** Differential gene expression results of stimulated CD4 T cells between SARS-CoV-2-reactive and non-reactive cells

**Supplementary Data 9:** Differential gene expression results of stimulated CD8 T cells between SARS-CoV-2-reactive and non-reactive cells

**Supplementary Data 10:** Clonotypes selected for orthotopic TCR replacement

**Supplementary Data 11:** Clonotypes discovered in GT\_2 after filtering

**Supplementary Data 12:** Clonotypes discovered in GT\_3 after filtering

**Supplementary Data 13:** Sequences of primers to amplify TCR targeting constructs for OTR
